# Supplementary material
Source: HighWire-hosted journal article supplement (https://diabetes.diabetesjournals.org/content/suppl/2008/01/11/db07-1292)
Supplement: db071292OnlineAppendix.pdf [file db071292OnlineAppendix.pdf]

ONLINE APPENDIX TABLE 1: DIABHYCAR COHORT – STRATIFICATION OF INCIDENT CASES OF CAD ACCORDING TO CAD BASELINE STATUS

| BASELINE             | FOLLOW-UP |      |    |     |           |           |         |                | Total |
|----------------------|-----------|------|----|-----|-----------|-----------|---------|----------------|-------|
|                      | Non CAD   | CABG | MI | SD  | CABG + MI | CABG + SD | MI + SD | CABG + MI + SD |       |
| Non CAD              | 2321      | 165  | 31 | 85  | 30        | 4         | 5       | 2              | 2643  |
| Angina Pectoris      | 224       | 43   | 7  | 21  | 9         | 2         | 1       | 0              | 307   |
| MI                   | 66        | 20   | 2  | 9   | 3         | 2         | 1       | 0              | 103   |
| Angina Pectoris + MI | 47        | 13   | 4  | 4   | 0         | 1         | 0       | 0              | 69    |
| <b>Total</b>         | 2658      | 241  | 44 | 119 | 42        | 9         | 7       | 2              | 3122  |

CAD: Coronary Artery Disease; CABG: Coronary Artery Bypass Graft; MI: Myocardial Infarction; SD: Sudden Death

ONLINE APPENDIX TABLE 2: DIABHYCAR COHORT – CHARACTERISTICS OF SUBJECTS AT BASELINE ACCORDING TO GENOTYPE

|                                                  | UCP2 -866G>A    |                 |                 | p      |
|--------------------------------------------------|-----------------|-----------------|-----------------|--------|
|                                                  | GG              | GA              | AA              |        |
| Patients (n)                                     | 1275            | 1427            | 420             | -      |
| Male sex: (%)                                    | 72%             | 74%             | 72%             | 0.49   |
| Age (years)                                      | 66 ± 8          | 66 ± 8          | 66 ± 9          | 0.83   |
| Age at diagnosis of diabetes (years)             | 55 ± 9          | 55 ± 10         | 56 ± 10         | 0.67   |
| Known duration of diabetes (years)               | 11 ± 8          | 10 ± 8          | 10 ± 8          | 0.15   |
| Fasting plasma glucose (mM)                      | 9.5 ± 3.0       | 9.6 ± 3.0       | 9.3 ± 3.3       | 0.20   |
| HbA1c (%)                                        | 7.9 ± 1.8       | 7.8 ± 1.7       | 7.8 ± 1.8       | 0.29   |
| BMI (kg/m <sup>2</sup> )                         | 29.3 ± 4.6      | 29.5 ± 4.7      | 29.4 ± 4.4      | 0.51   |
| Ponderal Status: Lean / Overweight / Obese (%) * | 12% / 46% / 32% | 13% / 43% / 44% | 12% / 42% / 45% | 0.55   |
| Triglycerides (mM)                               | 2.23 ± 1.44     | 2.21 ± 1.41     | 2.21 ± 1.38     | 0.90   |
| Total cholesterol (mM)                           | 5.82 ± 1.03     | 5.77 ± 1.10     | 5.82 ± 1.10     | 0.28   |
| LDL cholesterol (mM) †                           | 3.57 ± 0.87     | 3.50 ± 0.89     | 3.50 ± 0.88     | 0.06 ‡ |
| HDL cholesterol (mM)                             | 1.31 ± 0.35     | 1.32 ± 0.36     | 1.32 ± 0.33     | 0.84   |

|                                               |           |           |           |      |
|-----------------------------------------------|-----------|-----------|-----------|------|
| Creatinine clearance (ml/min)                 | 85 ± 30   | 86 ± 28   | 86 ± 33   | 0.52 |
| Urinary albumin excretion (mg/l)              | 234 ± 594 | 229 ± 689 | 217 ± 463 | 0.91 |
| U.A.E.: µAlbuminuria / macroalbuminuria (%) § | 76% / 24% | 78% / 23% | 78% / 23% | 0.93 |
| Arterial Hypertension (%)                     | 56%       | 56%       | 58%       | 0.72 |

---

Data expressed as mean ± SD;. Statistics of quantitative parameters are Students t tests performed with log-transformed data.

\* Ponderal Status. Lean: BMI <25 kg/m<sup>2</sup>; Overweight: 25 kg/m<sup>2</sup> ≤ BMI <30 kg/m<sup>2</sup>; Obese: BMI ≥30 kg/m<sup>2</sup>

† Data available for 1010 GG, 1153 GA and 335 AA carriers

‡ p=0.02 for a dominant model (AX vs GG carriers)

§ Urinary Albumin Excretion. µalbuminuria: 20 mg/l ≤ UAE <200 mg/l; macroalbuminuria: UAE ≥200 mg/l

|| Arterial hypertension: systolic blood pressure (SBP) >140 mmHg and/or diastolic blood pressure (DBP) >90 mmHg; or SBP and DBP below these values in the presence of antihypertensive medication and history of hypertension.

ONLINE APPENDIX TABLE 3. NCH COHORT - CHARACTERISTICS OF TYPE 2 DIABETIC MEN ACCORDING TO CORONARY ARTERY DISEASE STATUS

|                                                  | With CAD        | Without CAD     | p       |
|--------------------------------------------------|-----------------|-----------------|---------|
| Patients (n)                                     | 174             | 161             | -       |
| Age (years)                                      | 66 ± 11         | 60 ± 10         | <0.0001 |
| Age at diagnosis of diabetes (years)             | 52 ± 12         | 50 ± 11         | 0.08    |
| Known duration of diabetes (years)               | 14 ± 10         | 10 ± 9          | 0.006   |
| Fasting plasma glucose (mM)                      | 9.1 ± 4.2       | 9.0 ± 3.1       | 0.94    |
| Hemoglobin A1c (%)                               | 8.1 ± 1.8       | 7.9 ± 1.9       | 0.26    |
| Treatment (Diet / OHA / Insulin)                 | 15% / 50% / 35% | 15% / 64% / 21% | 0.01    |
| BMI (kg/m <sup>2</sup> )                         | 28.3 ± 4.5      | 28.7 ± 4.6      | 0.41    |
| Ponderal Status: Lean / Overweight / Obese (%) * | 23% / 44% / 33% | 23% / 43% / 34% | 0.96    |
| Triglycerides ≥1.70 mM (%) †                     | 52%             | 55%             | 0.90    |
| LDL cholesterol ≥3.35 mM (%) †                   | 66%             | 52%             | 0.004   |
| HDL cholesterol ≤1.02 mM (%) †                   | 38%             | 27%             | 0.001   |
| Creatinine clearance (ml/min)                    | 73 ± 33         | 88 ± 32         | <0.0001 |

|                                                        |                 |                 |        |
|--------------------------------------------------------|-----------------|-----------------|--------|
| U.A.E.: Normal / $\mu$ Albuminuria / Proteinuria (%) ‡ | 49% / 31% / 20% | 65% / 22% / 13% | 0.01   |
| Arterial Hypertension (%) §                            | 87%             | 70%             | 0.0002 |
| Tobacco smoking (%)                                    | 69%             | 57%             | 0.04   |

---

Data expressed as mean  $\pm$  SD. Statistics of quantitative parameters are Students t tests performed with log-transformed data.

OHA: oral hypoglycemic agents

\* Ponderal Status. Lean: BMI <25 kg/m<sup>2</sup>; Overweight: 25 kg/m<sup>2</sup>  $\leq$  BMI <30 kg/m<sup>2</sup>; Obese: BMI  $\geq$ 30 kg/m<sup>2</sup>

† present or pre-treatment (statins, fibrates) values: age-adjusted comparisons

‡ Urinary Albumin Excretion. Normal: UAE <20 mg/24h;  $\mu$ albuminuria: 20 mg/24h  $\leq$  UAE <300 mg/24h; proteinuria: UAE  $\geq$ 300 mg/24h

§ Arterial hypertension: systolic blood pressure (SBP) >140 mmHg and/or diastolic blood pressure (DBP) >90 mmHg; or SBP and DBP below these values in the presence of antihypertensive medication and history of hypertension.

|| Present or past tobacco smoking
